# Supplementary material for: Injection Molded PP Foams Using Food Ingredients for Food Packaging Applications
Source: MDPI journal article supplement (doi:10.3390/polym13020288), 2021-01-18
Supplement: s1 [file s1]

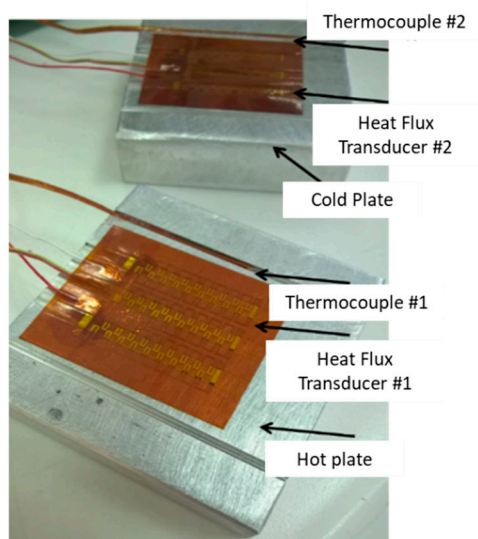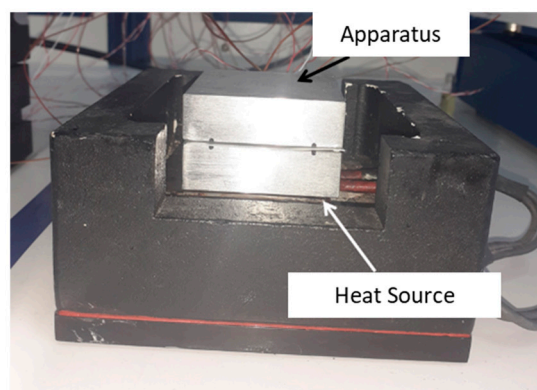

**Figure S1.** Apparatus for the measurement of thermal conductivity
